# Supplementary material for: BrainAgeNeXt: Advancing Brain Age Modeling for Individuals with Multiple Sclerosis
Source: PubMed Central journal article supplement — medRxiv. 2024 Aug 11:2024.08.10.24311686. Preprint. [Version 1] doi: 10.1101/2024.08.10.24311686 (PMC11326330; doi:10.1101/2024.08.10.24311686), 2024-08-11
Supplement: media-1.pdf [file media-1.pdf]

## Supplementary Material

| MS Cohort | Time since diagnosis (years) | Time between MRI sessions (years) | BA Change per year (years) |
|-----------|------------------------------|-----------------------------------|----------------------------|
| RADIEMS   | 2.23 ± 1.46                  | 3.21 ± 0.40                       | 1.23 ± 0.62                |
| LCL       | 14.22 ± 10.86                | 2.18 ± 0.51                       | 0.90 ± 1.06                |

**Supplementary Table 1. Brain age increases more rapidly at the early stages of multiple sclerosis.**

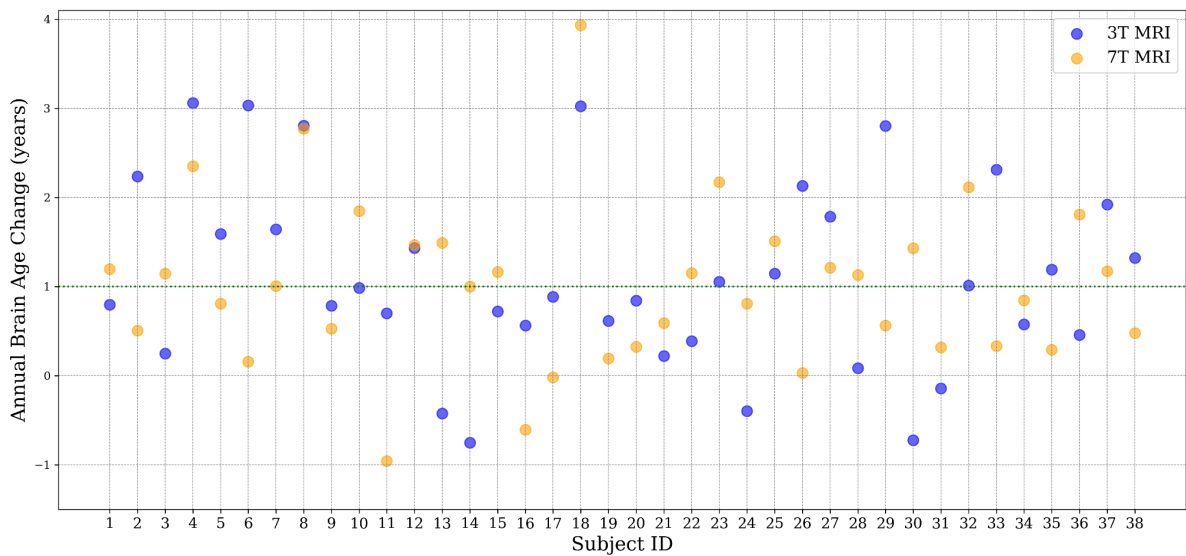

**Supplementary Figure 1. The annual change in brain age does not significantly differ when comparing 3T and 7T MRI brain age ( $p=0.6$ ). The plot shows a comparison of 38 pwMS from the LCL cohort imaged at both 3T and 7T.**

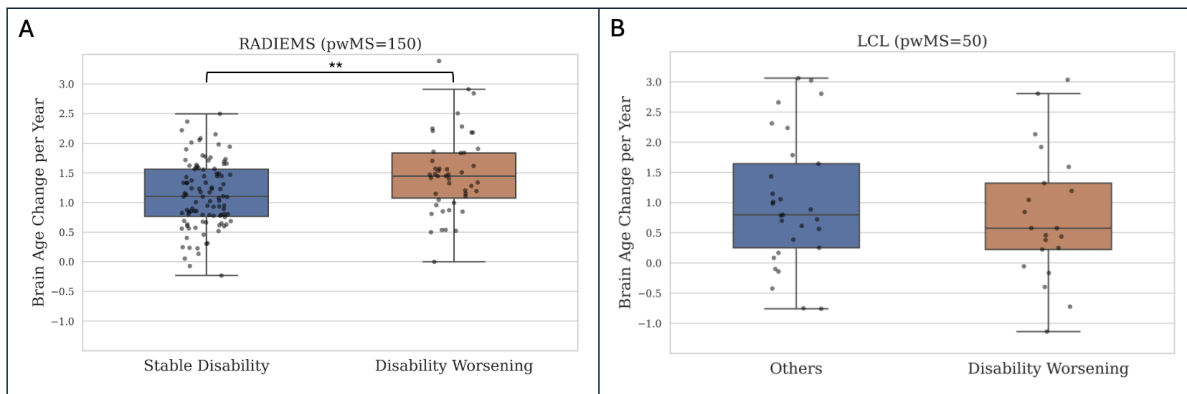

**Supplementary Figure 2. The annual brain age change is greater for subjects with disability worsening compared to stable ones in RADIEMS, whereas no differences are observed in LCL. Significance level: \*\*  $p < 0.01$ .**
